# Supplementary material
Source: PubMed Central journal article supplement (PMC4773292)
Supplement: NIHMS761166-supplement-1.pdf [file NIHMS761166-supplement-1.pdf]

**Supplemental Table 1. 54 positive peptides identified upon deconvolution.<sup>1</sup>**

| Antigen | Position | Sequence                     | Magnitude | Frequency | # Animals |
|---------|----------|------------------------------|-----------|-----------|-----------|
| Rv0125  | 306-320  | AVDGAPINSATAMAD <sup>1</sup> | 83.3      | 14%       | 2         |
| Rv0288  | 1-15     | MSQIMYNYPAMLGHA              | 31.7      | 7%        | 1         |
| Rv0288  | 11-25    | MLGHAGDMAGYAGTL              | 30.0      | 7%        | 1         |
| Rv0288  | 21-35    | YAGTLQSLGAEIAVE              | 20.0      | 7%        | 1         |
| Rv0288  | 41-55    | SAWQGDTGITYQAWQ <sup>2</sup> | 70.0      | 7%        | 1         |
| Rv0288  | 46-60    | DTGITYQAWQAQWNQ              | 61.7      | 7%        | 1         |
| Rv0288  | 61-75    | AMEDLVRAYHAMSST              | 265.0     | 21%       | 3         |
| Rv0288  | 66-80    | VRAYHAMSSTHEANT              | 248.3     | 21%       | 3         |
| Rv0288  | 71-85    | AMSSTHEANTMAMMA              | 36.7      | 7%        | 1         |
| Rv0288  | 76-90    | HEANTMAMMARDTAE              | 43.3      | 7%        | 1         |
| Rv0288  | 81-95    | MAMMARDTAEAAKWG              | 33.3      | 7%        | 1         |
| Rv1196  | 6-20     | ALPPEINSARMYAGP              | 36.7      | 7%        | 1         |
| Rv1196  | 21-35    | GSASLVAAAQMWDSDV             | 86.7      | 7%        | 1         |
| Rv1196  | 26-40    | VAAAQMWDSDVSDLF              | 61.7      | 7%        | 1         |
| Rv1196  | 31-45    | MWDSVASDLFSAASA              | 23.3      | 7%        | 1         |
| Rv1196  | 36-50    | ASDLFSAASAFQSVV              | 31.7      | 7%        | 1         |
| Rv1196  | 46-60    | FQSVVWGLTVGSWIG              | 45.0      | 7%        | 1         |
| Rv1196  | 51-65    | WGLTVGSWIGSSAGL              | 36.7      | 7%        | 1         |
| Rv1196  | 56-70    | GSWIGSSAGLMVAAA              | 25.0      | 7%        | 1         |
| Rv1886c | 236-250  | QIPKLVANNTLWVY               | 130.0     | 7%        | 1         |
| Rv1886c | 241-255  | VANNTLWVYCGNGT               | 75.0      | 7%        | 1         |
| Rv2608  | 286-300  | PLLEYAARFITPVHP              | 30.0      | 7%        | 1         |
| Rv2608  | 291-305  | AARFITPVHPGYTAT              | 30.0      | 7%        | 1         |
| Rv2608  | 301-315  | GYTATFLETSPQFFP              | 31.7      | 7%        | 1         |
| Rv2608  | 326-340  | VSVAQGVNTLHTAIM              | 30.0      | 7%        | 1         |
| Rv2608  | 366-380  | RYLQSLPAHLRPLD               | 26.7      | 7%        | 1         |
| Rv2608  | 486-500  | LLPSQDLPLLVPLRA              | 30.0      | 7%        | 1         |
| Rv2608  | 496-510  | VPLRAIPLLGNPLAD              | 21.7      | 7%        | 1         |
| Rv2608  | 561-575  | DALSGLGLPPPWQPA              | 21.7      | 7%        | 1         |
| RV3619  | 6-20     | QFGDVDAHGAMIRAQ              | 75.0      | 7%        | 1         |
| Rv3619  | 76-90    | QAAGNNMAQTDSAVG              | 183.3     | 14%       | 2         |
| Rv3619  | 80-94    | NNMAQTDSAVGSSWA              | 173.3     | 14%       | 2         |
| Rv3874  | 1-15     | MAEMKTDAAATLAQEA             | 36.7      | 7%        | 1         |
| Rv3874  | 11-25    | LAQEAGNFERISGDL              | 21.7      | 7%        | 1         |
| Rv3874  | 31-45    | QVESTAGSLQGQWRG              | 83.3      | 14%       | 2         |
| Rv3874  | 41-55    | GQWRGAAGTAAQAAV              | 70.0      | 7%        | 1         |
| Rv3874  | 46-60    | AAGTAAQAAVRFQE               | 95.0      | 14%       | 2         |
| Rv3874  | 51-65    | AQAAVVRFQEAANKQ              | 1146.6    | 21%       | 3         |
| Rv3874  | 56-70    | VRFQEAANKQKQELD              | 783.3     | 7%        | 2         |
| Rv3874  | 61-75    | AANKQKQELDEISTN              | 23.3      | 7%        | 2         |
| Rv3874  | 66-80    | KQELDEISTNIRQAG              | 20.0      | 7%        | 2         |
| Rv3874  | 71-85    | EISTNIRQAGVQYSR              | 745.0     | 36%       | 5         |
| Rv3874  | 76-90    | IRQAGVQYSRADEEQ              | 426.7     | 29%       | 4         |
| Rv3874  | 81-95    | VQYSRADEEQQALS               | 75.0      | 21%       | 3         |
| Rv3875  | 1-15     | MTEQQWNFAGIEAAA              | 2836.7    | 57%       | 8         |
| Rv3875  | 6-20     | WNFAGIEAAAASAIQG             | 2633.3    | 57%       | 8         |
| Rv3875  | 11-25    | IEAAASAIQGNVTSI              | 318.3     | 7%        | 1         |
| Rv3875  | 16-30    | SAIQGNVTSIHSLLD              | 41.7      | 7%        | 1         |
| Rv3875  | 46-60    | SGSEAYQGVQKQWDA              | 43.3      | 7%        | 1         |
| Rv3875  | 51-65    | YQGVQKQW DATATEL             | 375.0     | 29%       | 4         |
| Rv3875  | 56-70    | QKWDATATELNNALQ              | 131.7     | 29%       | 4         |
| Rv3875  | 71-85    | NLARTISEAGQAMAS              | 50.0      | 7%        | 1         |
| Rv3875  | 76-90    | ISEAGQAMASTE GNV             | 53.3      | 7%        | 1         |
| Rv3875  | 81-95    | QAMASTE GNV TGMFA            | 35.0      | 7%        | 1         |

<sup>1</sup> Antigens that were initially tested positive were deconvoluted into their individual peptides and tested in the ELISPOT system.
