# Supplementary material
Source: PubMed Central journal article supplement (PMC4773292)
Supplement: NIHMS761166-supplement-2.pdf [file NIHMS761166-supplement-2.pdf]

Supplemental data Table 2. MHC class II sequencing results <sup>1,2</sup>

| Animal | DR         | DR         | DR         | DR         | DQA        | DQA        | DQA        | DQB        | DQB        | DPA        | DPA        | DPA        | DPB        | DPB        |
|--------|------------|------------|------------|------------|------------|------------|------------|------------|------------|------------|------------|------------|------------|------------|
| II69   | DRB1*03:03 |            |            |            | DQA1*26:g1 |            |            | DQB1*18:g1 | DBQ1*18:g3 | DPA1*02:g2 | DPA1*06    |            | DPB1*07:01 |            |
| IB78   | DRB1*03:03 |            |            |            | DQA1*26:g1 | DQA1*26:g3 |            | DQB1*18:g1 |            | DPA1*02:g1 | DPA1*06    | DPA1*02:g2 | DPB1*07:01 |            |
| HB95   | DRB1*03:03 | DRB1*10:03 |            |            | DQA1*26:g1 | DQA1*01:g1 |            | DQB1*18:g1 | DQB1*06:g2 | DPA1*02:g1 | DPA1*02:g2 | DPA1*06    | DPB1*07:01 |            |
| HE06   | DRB1*03:03 | DRB1*03:09 |            |            | DQA1*01:g2 | DQA1*01:04 | DQA1*26:g1 | DQB1*18:g1 | DQB1*06:01 | DPA1*02:g1 | DPB1*06:02 |            |            |            |
| GP21   | DRB1*03:03 | DRB1*03:g1 |            |            | DQA1*26:g1 |            |            | DQB1*18:g1 |            | DPA1*04:g1 | DPA1*04:g2 |            | DPB1*02:01 | DPB1*03    |
| II21   | DRB1*03:09 |            |            |            | DQA1*01:g2 | DQA1*01:04 |            | DQB1*06:01 | DQB1*18:08 | DPA1*02:03 | DPA1*02:g1 |            | DPB1*06:01 |            |
| HN69   | DRB1*03:09 |            |            |            | DQA1*01:g2 | DQA1*01:04 |            | DQB1*06:01 | DQB1*18:08 | DPA1*02:03 | DPA1*06    |            | DPB1*06:01 |            |
| IJ42   | DRB1*03:g1 | DRB1*10:03 |            |            | DQA1*01:g1 | DQA1*01:g2 |            | DQB1*06:01 | DQB1*06:g2 | DPA1*04:g1 |            |            | DPB1*03    |            |
| IN85   | DRB1*03:g2 | DRB*W1:g1  | DRB*W6:02  | DRB*W6:g2  | DQA1*26:g1 |            |            | DQB1*18:g1 | DBQ1*18:g2 | DPA1*02:g1 | DPA1*02:g2 |            | DPB1*07:01 |            |
| CK53   | DRB1*03:g2 | DRB*W1:g1  | DRB*W6:02  | DRB*W6:g2  | DQA1*01:g2 | DQA1*01:04 |            | DQB1*06:01 | DBQ1*18:g2 | DPA1*02:g1 | DPA1*08    |            |            |            |
| GI89   | DRB1*04:06 | DRB5*03:01 |            |            | DQA1*26:g1 | DQA1*26:g1 |            | DQB1*18:g1 |            | DPA1*02:g1 | DPA1*02:g2 |            | DPB1*06:02 | DPB1*07:01 |
| II43   | DRB1*04:06 | DRB*W21:04 |            |            | DQA1*01:g3 | DQA1*26:g1 | DQA1*26:g3 | DQB1*06:g1 | DQB1*18:g3 | DPA1*06    | DPA1*08    |            |            |            |
| II07   | DRB1*04:06 | DRB5*03:01 |            |            | DQA1*01:g2 | DQA1*01:04 | DQA1*26:g1 | DQB1*06:01 |            | DPA1*02:g1 |            |            |            |            |
| IJ23   | DRB*W21:04 | DRB*W26    |            |            | DQA1*01:g3 | DQA1*01:05 | DQA1*26:g1 | DQB1*06:g1 | DQB1*18:g1 | DPA1*04:g2 |            |            | DPB1*02:01 |            |
| IM73   | DRB*W21:04 | DRB*W26    |            |            | DQA1*01:g3 | DQA1*01:05 | DQA1*26:g1 | DQB1*06:g1 | DQB1*18:g1 | DPA1*02:g1 | DPA1*02:g2 | DPA1*06    | DPB1*07:01 |            |
| GK87   | DRB1*03:03 | DRB1*04:06 | DRB1*10:07 | DRB5*03:01 | DQA1*26:g1 | DQA1*26:g1 |            | DQB1*18:g1 | DQB1*18:g3 | DPA1*02:g1 | DPA1*02:g2 |            | DPB1*05:01 | DPB1*07:01 |
| CL10   | DRB*W3:05  | DRB*W6:06  | DRB*W21:04 | DRB*W26:g  | DQA1*01:g3 |            |            | DQB1*06:g1 | DQB1*18:10 | DPA1*02:08 | DPA1*04:g1 |            | DPB1*03:g  | DPB1*06:04 |
| CR57   | DRB1*04:06 | DRB5*03:01 | DRB*W3     | DRB*W4:g1  | DQA1*23:01 | DQA1*26:g2 |            | DQB1*18:02 |            | DPA1*02:g1 |            |            | DPB1*08:01 |            |
| EA97   | DRB1*04:06 | DRB5*03:01 |            |            | DQA1*26:g1 | DQA1*26:g2 |            | DQB1*18:g1 |            | DPA1*02:g1 | DPA1*08    |            | DPB1*04    | DPB1*05:01 |
| FM29   | DRB1*04:06 | DRB5*03:01 |            |            | DQA1*26:g2 |            |            | DBQ1*18:g3 |            | DPA1*02:g1 |            |            | DPB1*05:01 | DPB1*08:01 |
| HK78   | DRB1*03:g1 | DRB1*10:03 |            |            | DQA1*26:g1 | DQA1*01:g1 |            | DQB1*06:g2 | DQB1*17:03 | DPA1*06    | DPA1*02:g1 | DPA1*02:10 | DPB1*07:03 |            |
| IL33   | DRB1*04:06 | DRB5*03:01 | DRB3*04:g1 | DRB*W4:g2  | DQA1*01:05 | DQA1*26:g2 |            | DQB1*06:09 | DQB1*18:g3 | DPA1*02:g1 | DPA1*06    | DPA1*02:10 | DPB1*08:01 |            |

<sup>1</sup> Animals coded the same color are related.<sup>2</sup> If the allele name contains a g1, g2 or g3, this describes a cluster of alleles, not a single allele.
