# Supplementary material
Source: PubMed Central journal article supplement (PMC4773292)
Supplement: NIHMS761166-supplement-3.pdf [file NIHMS761166-supplement-3.pdf]

Supplemental Table 3. Shared T-cell responses between human and macaques<sup>1</sup>

| Antigen Rv3875 (ESAT-6) |                  | References                          |
|-------------------------|------------------|-------------------------------------|
| 1-15                    | MTEQQWNFAGIEAAA  | (85, 102, 108, 133)                 |
| 6-20                    | WNFAGIEAAASAIQG  | (101, 102)                          |
| 11-25                   | IEAAASAIQGNVTSI  | (101, 102)                          |
| 16-30                   | SAIQGNVTSIHSLLD  | (101)                               |
| 46-60                   | SGSEAYQGVQQKWDA  | (101)                               |
| 51-65                   | YQGVQQKWDATATEL  | (101)                               |
| 56-70                   | QKWDATATELNNALQ  | (101, 102)                          |
| 71-85                   | NLARTISEAGQAMAS  | (101)                               |
| 76-90                   | ISEAGQAMASTEAGNV | (101, 102)                          |
| 81-95                   | QAMASTEAGNVGMFA  | (102-104)                           |
| Antigen Rv0288 (TB10.4) |                  |                                     |
| 1-15                    | MSQIMYNYPAMLGHA  | (105, 134-136)                      |
| 11-25                   | MLGHAGDMAGYAGTL  | (105, 135)                          |
| 21-35                   | YAGTLQSLGAEIAVE  | (135)                               |
| 41-55                   | SAWQGDGTGITYQAWQ | (135, 136)                          |
| 46-60                   | DTGITYQAWQAQWNQ  | (136)                               |
| 61-75                   | AMEDLVRA YHAMSST | (105, 134-136)                      |
| 66-80                   | VRAYHAMSSTHEANT  | (105)                               |
| 71-85                   | AMSSTHEANTMAMMA  | (135, 137)                          |
| 76-90                   | HEANTMAMMARDTAE  | (105, 136)                          |
| 81-95                   | MAMMARDTAEAAKWG  | (135, 136)                          |
| Antigen Rv1886c (85B)   |                  |                                     |
| 236-250                 | QIPKLVANNTRLWVY  | (79, 105, 106, 138-142)             |
| 241-255                 | VANNTRLWVYCGNGT  | (79, 105, 139, 140, 143, 144)       |
| Antigen Rv3874 (CFP-10) |                  |                                     |
| 1-15                    | MAEMKTDAATLAQEA  | (107, 108, 137)                     |
| 11-25                   | LAQEAGNFERISGDL  | (104, 143, 145-147)                 |
| 31-45                   | QVESTAGSLQGQWRG  | (102, 104, 107, 108, 143, 145, 147) |
| 41-55                   | GQWRGAAGTAAQAAV  | (101, 102, 107)                     |
| 46-60                   | AAGTAAQAAVVRFQE  | (101, 107)                          |
| 51-65                   | AQAAVVRFQEAANKQ  | (101, 102, 107)                     |
| 56-70                   | VRFQEAANKQKQELD  | (101, 102, 107)                     |

<sup>1</sup> Responses that were shared between humans and macaques are listed, including the reference to publication with more information for the human response.

|       |                 |                      |
|-------|-----------------|----------------------|
| 61-75 | AANKQKQELDEISTN | (102, 107, 108)      |
| 66-80 | KQELDEISTNIRQAG | (102, 107)           |
| 71-85 | EISTNIRQAGVQYSR | (101, 102, 148, 149) |
| 76-90 | IRQAGVQYSRADEEQ | (101, 102)           |
| 81-95 | VQYSRADEEQQALS  | (101, 107, 137)      |

Supplemental Table 3. Shared T-cell responses between human and macaques

| Antigen Rv3875 (ESAT-6) |                 | References                          |
|-------------------------|-----------------|-------------------------------------|
| 1-15                    | MTEQQWNFAGIEAAA | (81, 118, 123, 124)                 |
| 6-20                    | WNFAGIEAAASAIQG | (97, 118)                           |
| 11-25                   | IEAAASAIQGNVTSI | (97, 118)                           |
| 16-30                   | SAIQGNVTSIHSLLD | (97)                                |
| 46-60                   | SGSEAYQGVQKQWDA | (97)                                |
| 51-65                   | YQGVQKWDATATEL  | (97)                                |
| 56-70                   | QKWDATATELNNALQ | (97, 118)                           |
| 71-85                   | NLARTISEAGQAMAS | (97)                                |
| 76-90                   | ISEAGQAMASTEGNV | (97, 118)                           |
| 81-95                   | QAMASTEGNVTGMFA | (118-120)                           |
| Antigen Rv0288 (TB10.4) |                 | References                          |
| 1-15                    | MSQIMYNYPAMLGHA | (92, 125-127)                       |
| 11-25                   | MLGHAGDMAGYAGTL | (92, 126)                           |
| 21-35                   | YAGTLQSLGAEIAVE | (126)                               |
| 41-55                   | SAWQGDTGITYQAWQ | (126, 127)                          |
| 46-60                   | DTGITYQAWQAQWNQ | (127)                               |
| 61-75                   | AMEDLVRAYHAMSST | (92, 125-127)                       |
| 66-80                   | VRAYHAMSSTHEANT | (92)                                |
| 71-85                   | AMSSTHEANTMAMMA | (126, 128)                          |
| 76-90                   | HEANTMAMMARDTAE | (92, 127)                           |
| 81-95                   | MAMMARDTAEAAKWG | (126, 127)                          |
| Antigen Rv1886c (85B)   |                 | References                          |
| 236-250                 | QIPKLVANNTRLWVY | (75, 92, 121, 129-133)              |
| 241-255                 | VANNTRLWVYCGNGT | (75, 92, 130, 131, 134, 135)        |
| Antigen Rv3874 (CFP-10) |                 | References                          |
| 1-15                    | MAEMKTDAATLAQEA | (122, 123, 128)                     |
| 11-25                   | LAQEAGNFERISGDL | (120, 134, 136-138)                 |
| 31-45                   | QVESTAGSLQGQWRG | (118, 120, 122, 123, 134, 136, 138) |
| 41-55                   | GQWRGAAGTAAQAAV | (97, 118, 122)                      |

|                       |                 |                     |
|-----------------------|-----------------|---------------------|
| 46-60                 | AAGTAAQAAVVRFQE | (97, 122)           |
| 51-65                 | AQAAVVRFQEAANKQ | (97, 118, 122)      |
| 56-70                 | VRFQEAANKQKQELD | (97, 118, 122)      |
| 61-75                 | AANKQKQELDEISTN | (118, 122, 123)     |
| 66-80                 | KQELDEISTNIRQAG | (118, 122)          |
| 71-85                 | EISTNIRQAGVQYSR | (97, 118, 139, 140) |
| 76-90                 | IRQAGVQYSRADEEQ | (97, 118)           |
| 81-95                 | VQYSRADEEQQALS  | (97, 122, 128)      |
| Antigen Rv3619 (esxN) |                 |                     |
| 6-20                  | QFGDVDAHGAMIRAQ | (88)                |
